# Supplementary material
Source: PubMed Central journal article supplement (PMC1686199)
Supplement: rsbl20060465s18.pdf [file rsbl20060465s18.pdf]

## Supplementary Materials

[for Dietl and Hendricks, “Crab scars reveal survival advantage of left-handed snails.”]

Most *Conus* specimens examined came from the collections of the Paleontological Research Institution (PRI), Ithaca, NY or the Florida Museum of Natural History, University of Florida (UF), Gainesville.

Studied museum specimen lots of *Conus* include: PRI 50752, PRI 50753, and PRI 53632 (Acme, NC); PRI 50055, PRI 50060, PRI 50062, PRI 50759-50761, and PRI 50763-50766 (La Belle, FL); PRI 53164 and PRI 53171 (Quality Aggregates, FL); and UF 113740, UF 113751, and UF 113744 (Crescent Beach, SC).

Studied museum specimen lots of *Sinistrofulgur* and *Busycon* include: PRI 54464 and 54465 (Kirby Farm Pond, SC); PRI 54467-54469, PRI 54472-54475, UF 12567, UF 83001, UF 2173 (Natural Well, NC). *Conus* specimens from Lumber River, NC and Old Dock, NC, along with the Rozier Farm, NC, Old Dock, NC, and Shallotte, NC, whelk samples, are in the personal collections of G. P. D.
